# Supplementary material for: A Truncated NLR Protein, TIR-NBS2, Is Required for Activated Defense Responses in the exo70B1 Mutant
Source: PLOS journal article supplement (doi:10.1371/journal.pgen.1004945), 2015-01-24

**Figure S1**

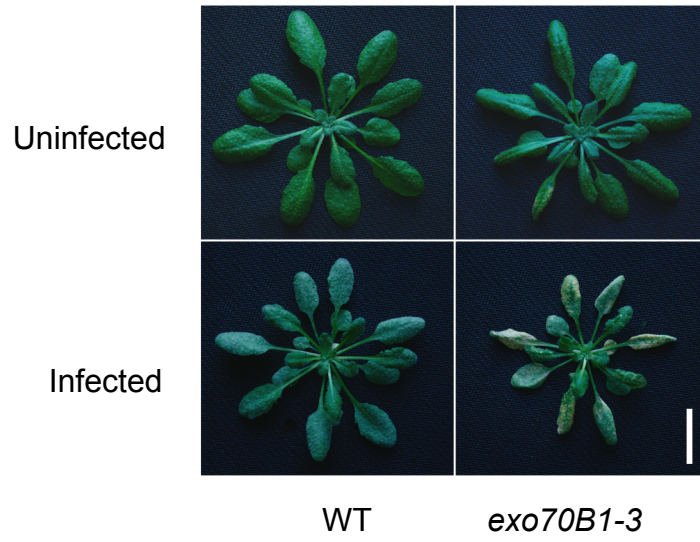

Supplement: S1 (10.1371/journal.pgen.1004945.s001) [file journal.pgen.1004945.s001]
